# Supplementary material for: In Vitro and In Vivo Activity of 14-O-[(4,6-Diamino-pyrimidine-2-yl) thioacetyl] Mutilin against Methicillin-Resistant Staphylococcus aureus
Source: MDPI journal article supplement (doi:10.3390/molecules26113277), 2021-05-28
Supplement: s1 [file s1]

# In vitro and In vivo Activity of 14-O-[(4,6-Diamino-pyrimidine-2-yl) thioacetyl] Mutilin Against Methicillin-Resistant *Staphylococcus aureus*

Yunxing Fu <sup>1,2</sup>, Chunqing Leng <sup>3</sup>, Yuan Fan <sup>4</sup>, Xia Ma <sup>1</sup>, Xianghui Li <sup>1</sup>, Xuefei Wang <sup>1</sup>, Zhenghuan Guo <sup>1</sup> and  
Xiujun Wang <sup>1,\*</sup>, Ruofeng Shang <sup>4,\*</sup>

<sup>1</sup> Zhengzhou Key Laboratory of Immunopharmacology of effective components of Chinese Veterinary Medicine, College of Veterinary Medicine, Henan University of Animal Husbandry and Economy, 450046 Zhengzhou, PR China; fyx1261648623@163.com (Y.X.); maxia801010@126.com (X.M.); huiskys@163.com (X.L.); hnmywxf001@126.com (X.W.); 80791@hnuah.edu.cn (X.Wa)

<sup>2</sup> Henan Provincial Research Center for the inheritance and innovation of Chinese veterinary medicine classic prescriptions, College of Veterinary Medicine, Henan University of Animal Husbandry and Economy, 450046 Zhengzhou, PR China

<sup>3</sup> Department of Animal Production, Jinhua Polytechnic, 321000, Jinhua, PR China; 20191009@jhc.edu.cn

<sup>4</sup> Key Laboratory of Veterinary Pharmaceutical Development, Ministry of Agriculture and Rural Affairs, Lanzhou Institute of Husbandry and Pharmaceutical Sciences of CAAS, 730050 Lanzhou, PR China

\* Correspondence: wxjfly@126.com (X.W.); shangrf1974@163.com (R.S.)

## Table of Contents

|                                                                                           |     |
|-------------------------------------------------------------------------------------------|-----|
| Figure S1. IR, <sup>1</sup> H-NMR and <sup>13</sup> C-NMR Spectra of DPTM.....            | 1-3 |
| Table S1. MIC values of DPTM and Tiamulin fumarate against clinical isolates of MRSA..... | 4   |

**Figure S1.** IR,  $^1\text{H}$ -NMR and  $^{13}\text{C}$ -NMR Spectra of DPTM

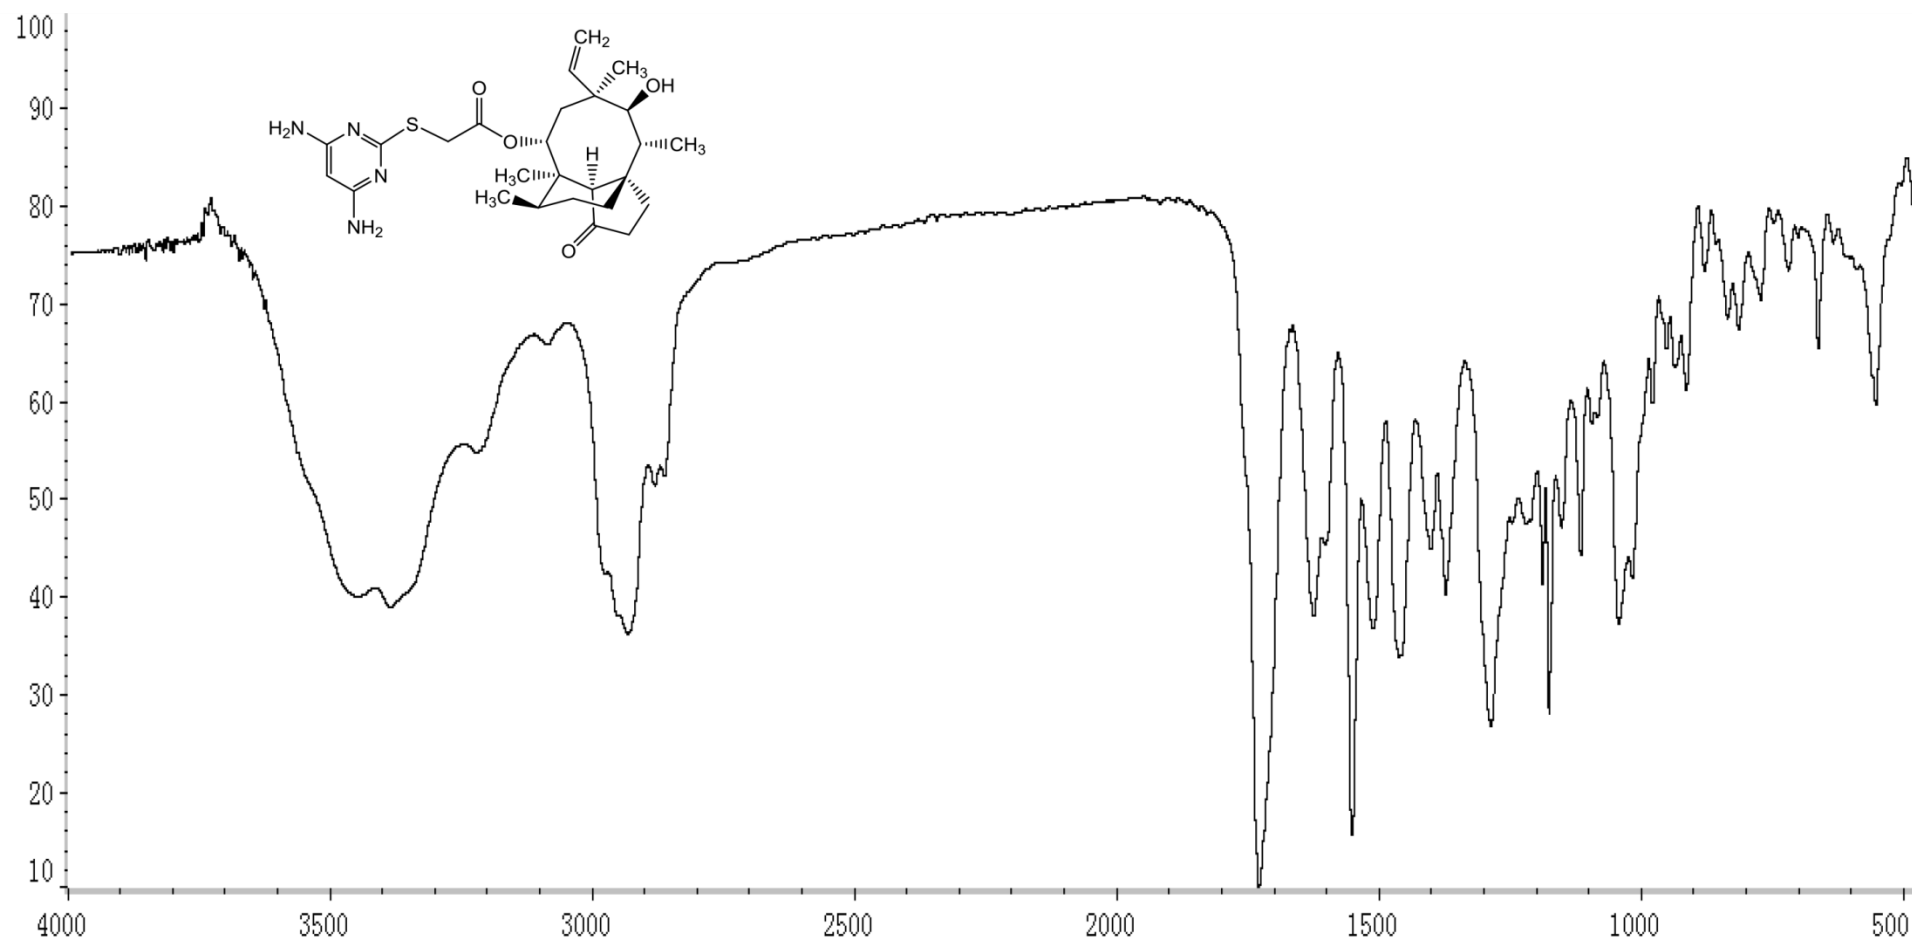

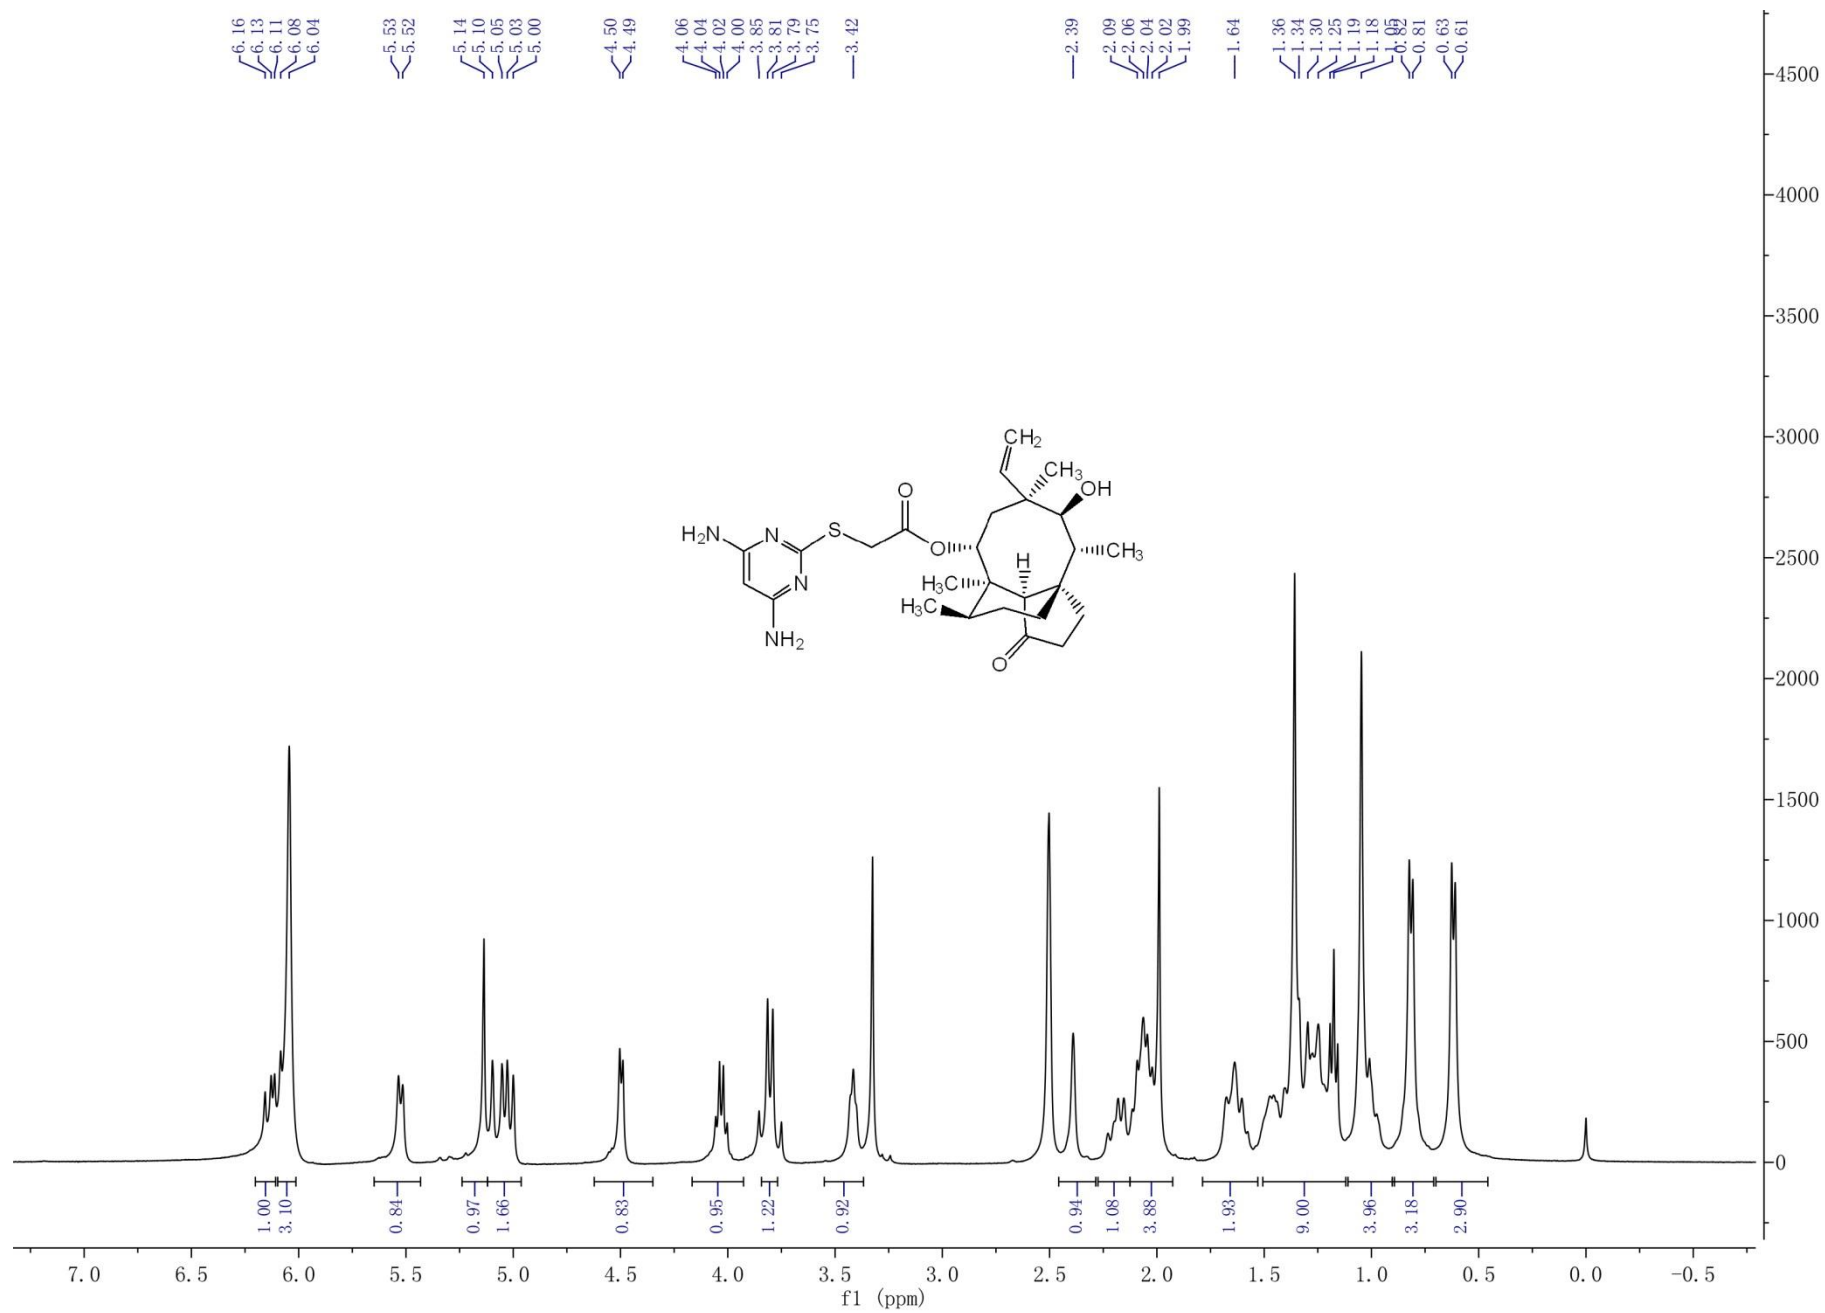

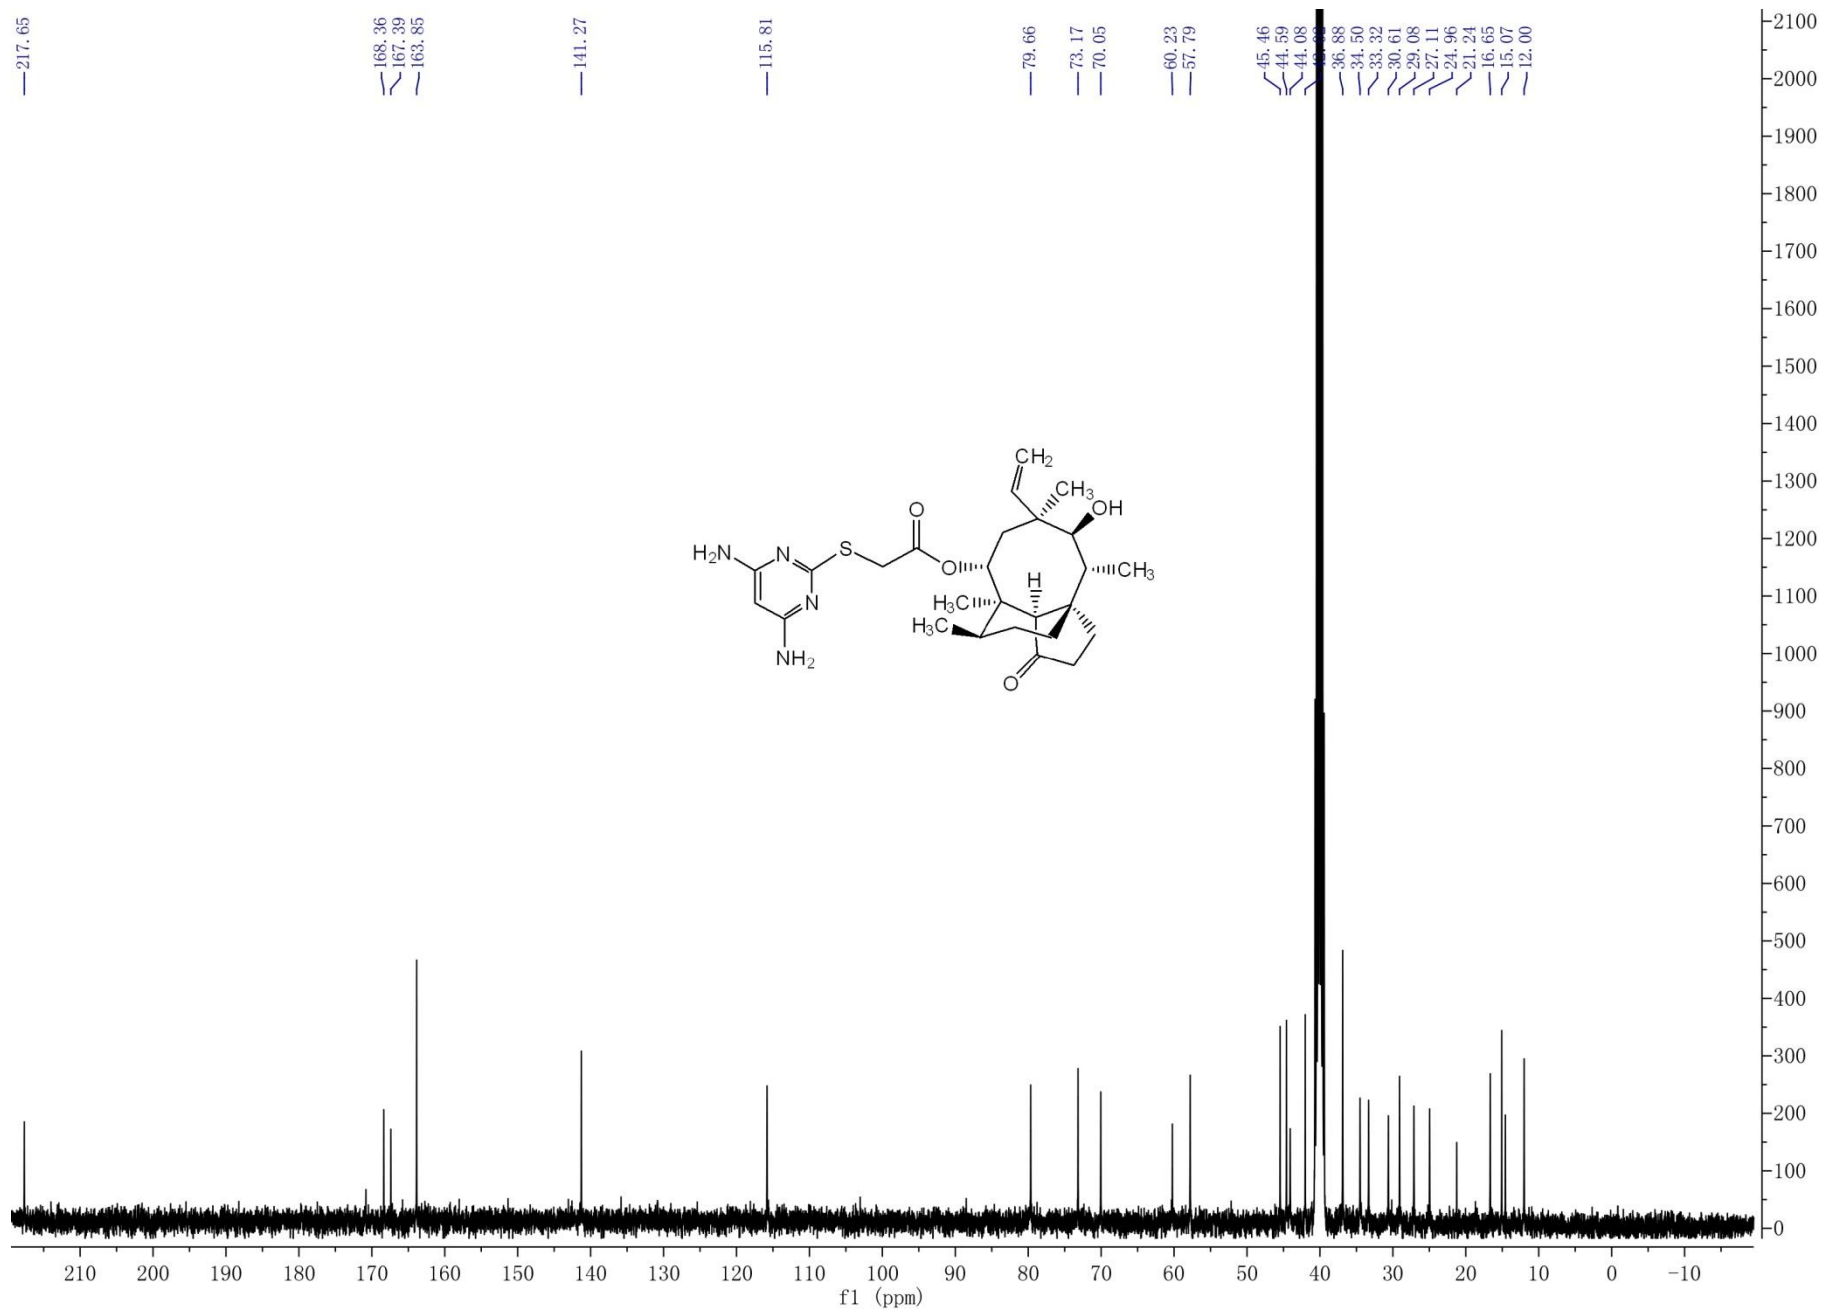

**Table S1.** MIC values of DPTM and Tiamulin fumarate against MRSA strains.

| Stain <sup>a</sup> | SCCmec <sup>b</sup> | MIC (µg/mL) |          | Stain <sup>a</sup> | SCCmec <sup>b</sup> | MIC (µg/mL) |          |
|--------------------|---------------------|-------------|----------|--------------------|---------------------|-------------|----------|
|                    |                     | DPTM        | Tiamulin |                    |                     | DPTM        | Tiamulin |
| MRSA-21            | III                 | 0.0625      | 0.25     | MRSA-75            | II                  | 0.25        | 0.5      |
| MRSA-23            | III                 | 0.0625      | 0.125    | MRSA-79            | II                  | 0.0625      | 0.125    |
| MRSA-24            | IV                  | 0.125       | 0.5      | MRSA-85            | II                  | 0.0625      | 0.25     |
| MRSA-32            | IV                  | 0.125       | 0.25     | MRSA-90            | IV                  | 0.125       | 0.25     |
| MRSA-33            | IV                  | 0.0625      | 0.125    | MRSA-94            | III                 | 0.0313      | 0.125    |
| MRSA-38            | I                   | 0.0625      | 0.125    | MRSA-99            | III                 | 0.0625      | 0.125    |
| MRSA-39            | II                  | 0.25        | 1        | MRSA-108           | II                  | 0.0625      | 0.25     |
| MRSA-40            | I                   | 0.0625      | 0.125    | MRSA-122           | I                   | 0.0625      | 0.25     |
| MRSA-44            | I                   | 0.0625      | 0.25     | MRSA-128           | IV                  | 0.0313      | 0.125    |
| MRSA-45            | II                  | 0.313       | 0.125    | MRSA-133           | IV                  | 0.125       | 0.25     |
| MRSA-47            | III                 | 0.125       | 0.5      | MRSA-135           | III                 | 0.25        | 0.5      |
| MRSA-48            | II                  | 0.125       | 0.25     | MRSA-141           | III                 | 0.125       | 0.25     |
| MRSA-51            | II                  | 0.25        | 1        | MRSA-147           | II                  | 0.0625      | 0.125    |
| MRSA-53            | II                  | 0.0625      | 0.25     | MRSA-149           | III                 | 0.125       | 0.5      |
| MRSA-54            | IV                  | 0.0625      | 0.5      | MRSA-153           | III                 | 0.0625      | 0.5      |
| MRSA-55            | IV                  | 0.125       | 0.25     | MRSA-155           | III                 | 0.0625      | 0.25     |
| MRSA-57            | IV                  | 0.0625      | 0.125    | MRSA-157           | IV                  | 0.0625      | 0.25     |
| MRSA-59            | III                 | 0.0625      | 0.25     | MRSA-159           | II                  | 0.0625      | 0.5      |
| MRSA-60            | III                 | 0.0313      | 0.125    | MRSA-160           | IV                  | 0.0625      | 0.5      |
| MRSA-61            | I                   | 0.0625      | 0.5      | MRSA-166           | IV                  | 0.0625      | 0.25     |
| MRSA-64            | IV                  | 0.0625      | 0.125    | MRSA-173           | II                  | 0.125       | 0.25     |
| MRSA-67            | III                 | 0.0625      | 0.25     | MRSA-177           | III                 | 0.125       | 0.5      |
| MRSA-68            | III                 | 0.125       | 0.25     | MRSA-180           | III                 | 0.25        | 1        |
| MRSA-70            | IV                  | 0.25        | 0.5      | MRSA-185           | II                  | 0.0625      | 0.125    |
| MRSA-71            | III                 | 0.0625      | 0.125    | MRSA-188           | IV                  | 0.125       | 0.125    |
| MRSA-72            | III                 | 0.0625      | 0.25     | MRSA-194           | IV                  | 0.0625      | 0.125    |
| MRSA-73            | II                  | 0.125       | 0.125    | MRSA-197           | III                 | 0.125       | 0.5      |

<sup>a</sup>Strains were collected from dairy farms located in Gansu province, China.<sup>b</sup>Staphylococcal cassette chromosome mec types.
